# Supplementary material
Source: PubMed Central journal article supplement (PMC6245211)
Supplement: DC180613SupplementaryData.pdf [file DC180613SupplementaryData.pdf]

SUPPLEMENTARY DATA

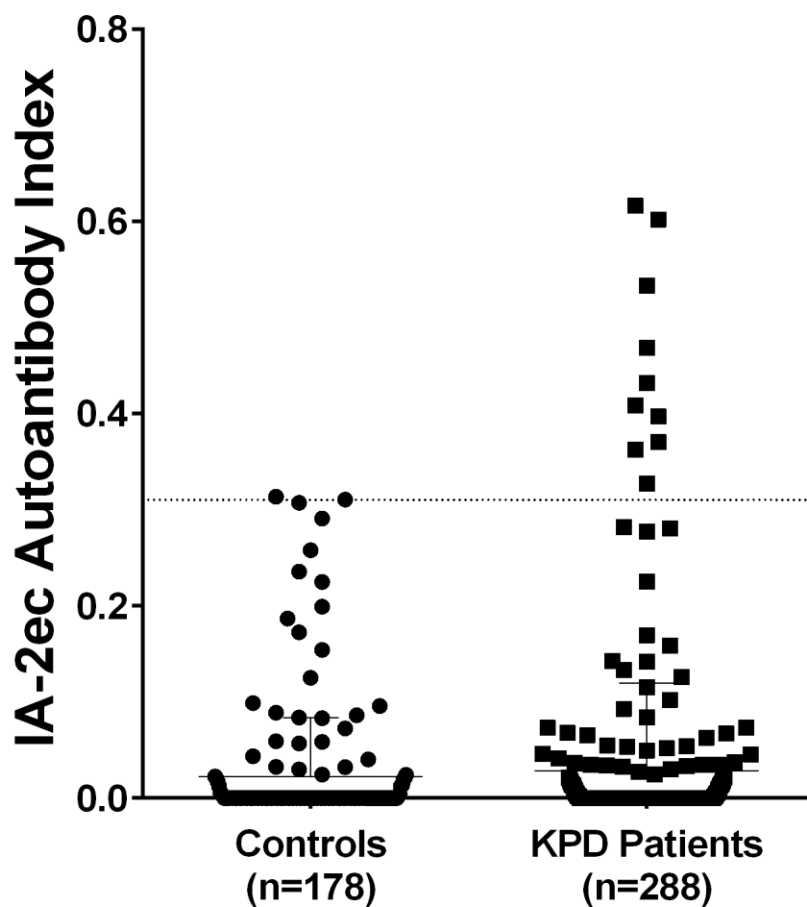

**Supplementary Figure 1.** Distribution of individual values for IA-2EC autoantibody index. Dashed line represents autoantibody index cutoff value of 0.317 as described (see text for details). 178 controls = 40% male; mean age  $34.6 \pm 10.2$  years. 288 KPD = 62% male; mean age  $36.6 \pm 0.8$  years.
